# Supplementary material
Source: PubMed Central journal article supplement (PMC2586874)
Supplement: NIHMS75938-supplement-supplement_1.pdf [file NIHMS75938-supplement-supplement_1.pdf]

Supplemental Materials for Shafer *et al.* "Widespread receptivity to neuropeptide PDF..."

N-D-07-01431

**Statistical analysis 1. On the effects of 10mM forskolin on l-vLNs (Data from figures 1C-G).**

Data were analyzed through one-way repeated measures ANOVA with the fixed factor Drug [Vehicle, FSK, ddFSK] and within-subjects factor time (56 measurements from 0 to 275 seconds). A Tukey post-hoc comparison of marginal means was performed on the levels of the fixed factor Drug.

**Tests of Within-Subjects Effects**

| Source      |                    | Type III Sum of Squares | df      | Mean Square | F       | Sig. |
|-------------|--------------------|-------------------------|---------|-------------|---------|------|
| time        | Sphericity Assumed | 11.673                  | 55      | .212        | 314.040 | .000 |
|             | Greenhouse-Geisser | 11.673                  | 2.679   | 4.358       | 314.040 | .000 |
|             | Huynh-Feldt        | 11.673                  | 3.015   | 3.872       | 314.040 | .000 |
|             | Lower-bound        | 11.673                  | 1.000   | 11.673      | 314.040 | .000 |
| time * Drug | Sphericity Assumed | 12.855                  | 110     | .117        | 172.924 | .000 |
|             | Greenhouse-Geisser | 12.855                  | 5.358   | 2.399       | 172.924 | .000 |
|             | Huynh-Feldt        | 12.855                  | 6.030   | 2.132       | 172.924 | .000 |
|             | Lower-bound        | 12.855                  | 2.000   | 6.427       | 172.924 | .000 |
| Error(time) | Sphericity Assumed | 1.561                   | 2310    | .001        |         |      |
|             | Greenhouse-Geisser | 1.561                   | 112.508 | .014        |         |      |
|             | Huynh-Feldt        | 1.561                   | 126.620 | .012        |         |      |
|             | Lower-bound        | 1.561                   | 42.000  | .037        |         |      |

**Tests of Between-Subjects Effects**

| Source    | Type III Sum of Squares | df | Mean Square | F         | Sig. |
|-----------|-------------------------|----|-------------|-----------|------|
| Intercept | 1985.247                | 1  | 1985.247    | 36565.922 | .000 |
| Drug      | 33.240                  | 2  | 16.620      | 306.120   | .000 |
| Error     | 2.280                   | 42 | .054        |           |      |

### Tukey Multiple Comparisons

| Drug    | N  | Subset |       |
|---------|----|--------|-------|
|         | 1  | 2      | 1     |
| FSK     | 14 | .7262  |       |
| Vehicle | 14 |        | .9701 |
| ddFSK   | 17 |        | .9776 |
| Sig.    |    | 1.000  | .792  |

There is a strongly significant within-subjects effect of time ( $p < 0.001$ ). There is also a strongly significant ( $p < 0.001$ ) effect of the drug treatment. A Tukey HSD post-hoc comparison of the treatment means reveals that the vehicle and ddFSK treatments comprise a statistically homogenous subset that is distinct from the FSK treatment group.

**Statistical analysis 2. On the effects of 10<sup>-5</sup>M PDF on the l-vLNs and s-vLNs (data from figure 2)**

Data were analyzed by two-way repeated measures ANOVA with fixed factors cell-type [l-vLNs or s-vLNs] and peptide [PDF, Vehicle] using all time measurements as within-subjects factors.

**Tests of Within-Subjects Effects**

| Source                |                    | Type III Sum of Squares | df     | Mean Square | F      | Sig. |
|-----------------------|--------------------|-------------------------|--------|-------------|--------|------|
| time                  | Sphericity Assumed | 6.412                   | 55     | .117        | 53.338 | .000 |
|                       | Greenhouse-Geisser | 6.412                   | 1.978  | 3.242       | 53.338 | .000 |
|                       | Huynh-Feldt        | 6.412                   | 2.258  | 2.839       | 53.338 | .000 |
|                       | Lower-bound        | 6.412                   | 1.000  | 6.412       | 53.338 | .000 |
| time * Cell           | Sphericity Assumed | 1.141                   | 55     | .021        | 9.490  | .000 |
|                       | Greenhouse-Geisser | 1.141                   | 1.978  | .577        | 9.490  | .000 |
|                       | Huynh-Feldt        | 1.141                   | 2.258  | .505        | 9.490  | .000 |
|                       | Lower-bound        | 1.141                   | 1.000  | 1.141       | 9.490  | .004 |
| time * peptide        | Sphericity Assumed | 1.846                   | 55     | .034        | 15.356 | .000 |
|                       | Greenhouse-Geisser | 1.846                   | 1.978  | .933        | 15.356 | .000 |
|                       | Huynh-Feldt        | 1.846                   | 2.258  | .817        | 15.356 | .000 |
|                       | Lower-bound        | 1.846                   | 1.000  | 1.846       | 15.356 | .000 |
| time * Cell * peptide | Sphericity Assumed | 1.110                   | 55     | .020        | 9.232  | .000 |
|                       | Greenhouse-Geisser | 1.110                   | 1.978  | .561        | 9.232  | .000 |
|                       | Huynh-Feldt        | 1.110                   | 2.258  | .491        | 9.232  | .000 |
|                       | Lower-bound        | 1.110                   | 1.000  | 1.110       | 9.232  | .004 |
| Error(time)           | Sphericity Assumed | 4.448                   | 2035   | .002        |        |      |
|                       | Greenhouse-Geisser | 4.448                   | 73.178 | .061        |        |      |
|                       | Huynh-Feldt        | 4.448                   | 83.556 | .053        |        |      |
|                       | Lower-bound        | 4.448                   | 37.000 | .120        |        |      |

**Tests of Between-Subjects Effects**

| Source         | Type III Sum of Squares | df | Mean Square | F         | Sig. |
|----------------|-------------------------|----|-------------|-----------|------|
| Intercept      | 1941.465                | 1  | 1941.465    | 11797.583 | .000 |
| Cell           | 3.250                   | 1  | 3.250       | 19.749    | .000 |
| Peptide        | 3.145                   | 1  | 3.145       | 19.108    | .000 |
| Cell * Peptide | 1.222                   | 1  | 1.222       | 7.424     | .010 |
| Error          | 6.089                   | 37 | .165        |           |      |

There is a strongly significant within-subjects effect of time ( $p < 0.001$ ). There is also a strongly significant ( $p < 0.001$ ) effect of both main effects factors (Peptide and Cell type). Additionally, there was a significant interaction ( $p = 0.01$ ) indicating that the different cell types responded differently to the peptide treatments.

**Statistical analysis 3. On the effects of various concentrations of PDF on the s-vLNs (data from figure 3A)**

Data were analyzed through one-way repeated measures ANOVA with the fixed factor PDF Concentration [Vehicle,  $10^{-9}$  PDF,  $10^{-8}$  PDF,  $10^{-7}$  PDF,  $10^{-6}$  PDF,  $10^{-5}$  PDF].

**Tests of Within-Subjects Effects**

| Source                  |                    | Type III Sum of Squares | df      | Mean Square | F       | Sig. |
|-------------------------|--------------------|-------------------------|---------|-------------|---------|------|
| time                    | Sphericity Assumed | 42.526                  | 98      | .434        | 273.412 | .000 |
|                         | Greenhouse-Geisser | 42.526                  | 2.752   | 15.450      | 273.412 | .000 |
|                         | Huynh-Feldt        | 42.526                  | 3.096   | 13.734      | 273.412 | .000 |
|                         | Lower-bound        | 42.526                  | 1.000   | 42.526      | 273.412 | .000 |
| time * PDFConcentration | Sphericity Assumed | 11.170                  | 490     | .023        | 14.364  | .000 |
|                         | Greenhouse-Geisser | 11.170                  | 13.762  | .812        | 14.364  | .000 |
|                         | Huynh-Feldt        | 11.170                  | 15.482  | .722        | 14.364  | .000 |
|                         | Lower-bound        | 11.170                  | 5.000   | 2.234       | 14.364  | .000 |
| Error(time)             | Sphericity Assumed | 10.421                  | 6566    | .002        |         |      |
|                         | Greenhouse-Geisser | 10.421                  | 184.416 | .057        |         |      |
|                         | Huynh-Feldt        | 10.421                  | 207.453 | .050        |         |      |
|                         | Lower-bound        | 10.421                  | 67.000  | .156        |         |      |

**Tests of Between-Subjects Effects**

| Source           | Type III Sum of Squares | df | Mean Square | F         | Sig. |
|------------------|-------------------------|----|-------------|-----------|------|
| Intercept        | 5063.635                | 1  | 5063.635    | 22961.759 | .000 |
| PDFConcentration | 44.129                  | 5  | 8.826       | 40.022    | .000 |
| Error            | 14.775                  | 67 | .221        |           |      |

There is a strongly significant within-subjects effect of time ( $p < 0.001$ ). There is also a strongly significant ( $p < 0.001$ ) effect of the PDF concentration treatment suggesting that FRET values are responsive to PDF concentrations.

**Statistical analysis 4. On the effects of peptide washout following the addition of 10<sup>-6</sup>M PDF on the s-vLNs (data from figures 3C and D).**

Data were analyzed with a set of two one-way repeated measures ANOVAs followed by Tukey post-hoc comparisons. The analyses were delimited into pre-wash sets of treatments and post-wash sets of treatments. Each set (pre-wash and post-wash) were treated separately.

Prewash

**Tests of Within-Subjects Effects**

| Source           |                    | Type III Sum of Squares | df     | Mean Square | F      | Sig. |
|------------------|--------------------|-------------------------|--------|-------------|--------|------|
| time             | Sphericity Assumed | 7.077                   | 27     | .262        | 87.363 | .000 |
|                  | Greenhouse-Geisser | 7.077                   | 2.666  | 2.654       | 87.363 | .000 |
|                  | Huynh-Feldt        | 7.077                   | 3.649  | 1.939       | 87.363 | .000 |
|                  | Lower-bound        | 7.077                   | 1.000  | 7.077       | 87.363 | .000 |
| time * Treatment | Sphericity Assumed | 3.340                   | 54     | .062        | 20.615 | .000 |
|                  | Greenhouse-Geisser | 3.340                   | 5.332  | .626        | 20.615 | .000 |
|                  | Huynh-Feldt        | 3.340                   | 7.298  | .458        | 20.615 | .000 |
|                  | Lower-bound        | 3.340                   | 2.000  | 1.670       | 20.615 | .000 |
| Error(time)      | Sphericity Assumed | 1.296                   | 432    | .003        |        |      |
|                  | Greenhouse-Geisser | 1.296                   | 42.658 | .030        |        |      |
|                  | Huynh-Feldt        | 1.296                   | 58.386 | .022        |        |      |
|                  | Lower-bound        | 1.296                   | 16.000 | .081        |        |      |

**Tests of Between-Subjects Effects**

| Source    | Type III Sum of Squares | df | Mean Square | F        | Sig. |
|-----------|-------------------------|----|-------------|----------|------|
| Intercept | 360.231                 | 1  | 360.231     | 2317.727 | .000 |
| Treatment | 6.785                   | 2  | 3.392       | 21.827   | .000 |
| Error     | 2.487                   | 16 | .155        |          |      |

**Tukey Multiple Comparisons**

| Treatment   | N | Subset |        |
|-------------|---|--------|--------|
|             |   | 1      | 2      |
| MockWashout | 5 | .7256  |        |
| Washout     | 9 | .8136  |        |
| Vehicle     | 5 |        | 1.0251 |
| Sig.        |   | .139   | 1.000  |

There is a strongly significant within-subjects effect of time (p<0.001). There is also a strongly significant (p<0.001) effect of the treatment. A Tukey post-hoc comparison reveals that the

Mock-washout and Washout treatments (heretofore only exposed to PDF) form a homogenous subset of marginal means.

Postwash

**Tests of Within-Subjects Effects**

| Source           |                    | Type III Sum of Squares | df     | Mean Square | F     | Sig. |
|------------------|--------------------|-------------------------|--------|-------------|-------|------|
| time             | Sphericity Assumed | 1.058                   | 98     | .011        | 3.030 | .000 |
|                  | Greenhouse-Geisser | 1.058                   | 2.175  | .486        | 3.030 | .057 |
|                  | Huynh-Feldt        | 1.058                   | 2.845  | .372        | 3.030 | .041 |
|                  | Lower-bound        | 1.058                   | 1.000  | 1.058       | 3.030 | .101 |
| time * Treatment | Sphericity Assumed | 2.315                   | 196    | .012        | 3.315 | .000 |
|                  | Greenhouse-Geisser | 2.315                   | 4.351  | .532        | 3.315 | .019 |
|                  | Huynh-Feldt        | 2.315                   | 5.690  | .407        | 3.315 | .010 |
|                  | Lower-bound        | 2.315                   | 2.000  | 1.157       | 3.315 | .062 |
| Error(time)      | Sphericity Assumed | 5.586                   | 1568   | .004        |       |      |
|                  | Greenhouse-Geisser | 5.586                   | 34.807 | .160        |       |      |
|                  | Huynh-Feldt        | 5.586                   | 45.522 | .123        |       |      |
|                  | Lower-bound        | 5.586                   | 16.000 | .349        |       |      |

**Tests of Between-Subjects Effects**

| Source    | Type III Sum of Squares | df | Mean Square | F       | Sig. |
|-----------|-------------------------|----|-------------|---------|------|
| Intercept | 1052.779                | 1  | 1052.779    | 620.641 | .000 |
| Treatment | 32.509                  | 2  | 16.255      | 9.583   | .002 |
| Error     | 27.140                  | 16 | 1.696       |         |      |

**Tukey Multiple Comparisons**

| Treatment | N | Subset |       |
|-----------|---|--------|-------|
|           | 1 | 2      | 1     |
| MockWash  | 5 | .5761  |       |
| Washout   | 9 |        | .8451 |
| Vehicle   | 5 |        | .9102 |
| Sig.      |   | 1.000  | .676  |

There is a strongly significant within-subjects effect of time ( $p < 0.001$ ). There is also a strongly significant ( $p = 0.002$ ) effect of the treatment. A Tukey post-hoc comparison reveals that the Mock-washout and Washout treatments (previously only exposed to PDF) are no longer statistically homogenous. Instead, the washout treatment (exposed to PDF and then washed) is now statistically homogenous with the vehicle treatment.

**Statistical analysis 5. On the effects of a suite of neuropeptides at 10<sup>-6</sup>M on the s-vLNs (data from figure 3E).**

Data were analyzed through one-way repeated measures ANOVA with the fixed factor Peptide [DH31, DH44, sNPF, CT, IPNa, PACAP38, PDF, Vehicle, VIP, MTY $\alpha$ , AstC, DMS] and within-subjects factor time. A Tukey post-hoc comparison of marginal means was performed on the levels of the fixed factor Peptide.

**Tests of Within-Subjects Effects**

| Source         |                    | Type III Sum of Squares | df      | Mean Square | F       | Sig. |
|----------------|--------------------|-------------------------|---------|-------------|---------|------|
| time           | Sphericity Assumed | 32.436                  | 98      | .331        | 319.584 | .000 |
|                | Greenhouse-Geisser | 32.436                  | 3.066   | 10.578      | 319.584 | .000 |
|                | Huynh-Feldt        | 32.436                  | 3.432   | 9.452       | 319.584 | .000 |
|                | Lower-bound        | 32.436                  | 1.000   | 32.436      | 319.584 | .000 |
| time * Peptide | Sphericity Assumed | 17.502                  | 1078    | .016        | 15.676  | .000 |
|                | Greenhouse-Geisser | 17.502                  | 33.729  | .519        | 15.676  | .000 |
|                | Huynh-Feldt        | 17.502                  | 37.749  | .464        | 15.676  | .000 |
|                | Lower-bound        | 17.502                  | 11.000  | 1.591       | 15.676  | .000 |
| Error(time)    | Sphericity Assumed | 12.585                  | 12152   | .001        |         |      |
|                | Greenhouse-Geisser | 12.585                  | 380.214 | .033        |         |      |
|                | Huynh-Feldt        | 12.585                  | 425.532 | .030        |         |      |
|                | Lower-bound        | 12.585                  | 124.000 | .101        |         |      |

**Tests of Between-Subjects Effects**

| Source    | Type III Sum of Squares | df  | Mean Square | F         | Sig. |
|-----------|-------------------------|-----|-------------|-----------|------|
| Intercept | 10827.710               | 1   | 10827.710   | 43177.426 | .000 |
| Peptide   | 51.333                  | 11  | 4.667       | 18.609    | .000 |
| Error     | 31.096                  | 124 | .251        |           |      |



### Tukey Multiple Comparisons

| Peptide | N  | Subset |       |
|---------|----|--------|-------|
|         |    | 1      | 2     |
| PDF     | 13 | .7727  |       |
| DH31    | 13 | .7934  |       |
| sNPF    | 12 |        | .9004 |
| DH44    | 12 |        | .9068 |
| CT      | 10 |        | .9173 |
| PACAP38 | 12 |        | .9221 |
| IPNa    | 8  |        | .9224 |
| Vehicle | 11 |        | .9408 |
| VIP     | 11 |        | .9430 |
| MTYa    | 9  |        | .9535 |
| AstC    | 14 |        | .9541 |
| DMS     | 11 |        | .9627 |
| Sig.    |    | .998   | .150  |

There is a strongly significant within-subjects effect of time ( $p < 0.001$ ). There is also a strongly significant ( $p < 0.001$ ) effect of the peptide treatment. A Tukey HSD post-hoc comparison of the treatment means reveals that only the DH31 and PDF marginal means are statistically distinct from the vehicle controls. Both statistically distinct means form a single homogenous subset with FRET loss levels greater than controls.

**Statistical analysis 6. On the effects of a suite of neuropeptides at 10<sup>-6</sup>M on the l-vLNs (data from Figure 3F).**

Data were analyzed through one-way repeated measures ANOVA with the fixed factor Peptide [DH31, DH44, sNPF, CT, IPNa, PACAP38, PDF, Vehicle, VIP, MTYa, AstC, DMS] and within-subjects factor time. A Tukey post-hoc comparison of marginal means was performed on the levels of the fixed factor Peptide.

**Tests of Within-Subjects Effects**

| Source         |                    | Type III Sum of Squares | df      | Mean Square | F       | Sig. |
|----------------|--------------------|-------------------------|---------|-------------|---------|------|
| time           | Sphericity Assumed | 18.841                  | 98      | .192        | 390.710 | .000 |
|                | Greenhouse-Geisser | 18.841                  | 3.226   | 5.840       | 390.710 | .000 |
|                | Huynh-Feldt        | 18.841                  | 3.769   | 4.998       | 390.710 | .000 |
|                | Lower-bound        | 18.841                  | 1.000   | 18.841      | 390.710 | .000 |
| time * Peptide | Sphericity Assumed | 16.974                  | 1078    | .016        | 32.001  | .000 |
|                | Greenhouse-Geisser | 16.974                  | 35.490  | .478        | 32.001  | .000 |
|                | Huynh-Feldt        | 16.974                  | 41.464  | .409        | 32.001  | .000 |
|                | Lower-bound        | 16.974                  | 11.000  | 1.543       | 32.001  | .000 |
| Error(time)    | Sphericity Assumed | 4.340                   | 8820    | .000        |         |      |
|                | Greenhouse-Geisser | 4.340                   | 290.370 | .015        |         |      |
|                | Huynh-Feldt        | 4.340                   | 339.247 | .013        |         |      |
|                | Lower-bound        | 4.340                   | 90.000  | .048        |         |      |

**Tests of Between-Subjects Effects**

| Source    | Type III Sum of Squares | df | Mean Square | F          | Sig. |
|-----------|-------------------------|----|-------------|------------|------|
| Intercept | 7566.269                | 1  | 7566.269    | 110753.345 | .000 |
| Peptide   | 47.141                  | 11 | 4.286       | 62.730     | .000 |
| Error     | 6.148                   | 90 | .068        |            |      |

### Tukey Multiple Comparisons

| Peptide | N  | Subset |       |       |       |       |
|---------|----|--------|-------|-------|-------|-------|
|         | 1  | A      | B     | C     | D     | E     |
| DH31    | 7  | .6885  |       |       |       |       |
| DH44    | 5  |        | .8957 |       |       |       |
| sNPF    | 6  |        | .9133 | .9133 |       |       |
| CT      | 6  |        | .9134 | .9134 |       |       |
| IPNa    | 6  |        | .9222 | .9222 | .9222 |       |
| PACAP38 | 10 |        | .9333 | .9333 | .9333 |       |
| PDF     | 14 |        | .9388 | .9388 | .9388 |       |
| Vehicle | 14 |        | .9388 | .9388 | .9388 |       |
| VIP     | 6  |        |       | .9570 | .9570 | .9570 |
| MTYa    | 9  |        |       |       | .9590 | .9590 |
| AstC    | 12 |        |       |       | .9634 | .9634 |
| DMS     | 7  |        |       |       |       | .9990 |
| Sig.    |    | 1.000  | .080  | .070  | .111  | .097  |

There is a strongly significant within-subjects effect of time ( $p < 0.001$ ). There is also a strongly significant ( $p < 0.001$ ) effect of the peptide treatment. A Tukey HSD post-hoc comparison of the treatment means reveals that only the DH31 and DMS marginal means are statistically distinct from the vehicle controls. The DH31 produces a higher FRET loss while the DMS produces a lower FRET loss than controls.

**Statistical analysis 7. On the effects of 10<sup>-5</sup>M PDF on s-vLNs in *w<sup>1118</sup>* and *han<sup>5304</sup>* flies (data from figure 4).**

Data were analyzed through two-way repeated measures ANOVA with the fixed factors genotype [*w<sup>1118</sup>*, *han<sup>5304</sup>*] and Drug [Vehicle, FSK, PDF] followed by a Tukey post-hoc comparison of the three levels of Drug.

**Tests of Within-Subjects Effects**

| Source                 |                    | Type III Sum of Squares | df      | Mean Square | F       | Sig. |
|------------------------|--------------------|-------------------------|---------|-------------|---------|------|
| time                   | Sphericity Assumed | 39.231                  | 98      | .400        | 211.924 | .000 |
|                        | Greenhouse-Geisser | 39.231                  | 2.611   | 15.026      | 211.924 | .000 |
|                        | Huynh-Feldt        | 39.231                  | 2.962   | 13.246      | 211.924 | .000 |
|                        | Lower-bound        | 39.231                  | 1.000   | 39.231      | 211.924 | .000 |
| time * Genotype        | Sphericity Assumed | 1.913                   | 98      | .020        | 10.335  | .000 |
|                        | Greenhouse-Geisser | 1.913                   | 2.611   | .733        | 10.335  | .000 |
|                        | Huynh-Feldt        | 1.913                   | 2.962   | .646        | 10.335  | .000 |
|                        | Lower-bound        | 1.913                   | 1.000   | 1.913       | 10.335  | .002 |
| time * Drug            | Sphericity Assumed | 13.423                  | 196     | .068        | 36.256  | .000 |
|                        | Greenhouse-Geisser | 13.423                  | 5.222   | 2.571       | 36.256  | .000 |
|                        | Huynh-Feldt        | 13.423                  | 5.923   | 2.266       | 36.256  | .000 |
|                        | Lower-bound        | 13.423                  | 2.000   | 6.712       | 36.256  | .000 |
| time * Genotype * Drug | Sphericity Assumed | 2.692                   | 196     | .014        | 7.271   | .000 |
|                        | Greenhouse-Geisser | 2.692                   | 5.222   | .516        | 7.271   | .000 |
|                        | Huynh-Feldt        | 2.692                   | 5.923   | .454        | 7.271   | .000 |
|                        | Lower-bound        | 2.692                   | 2.000   | 1.346       | 7.271   | .001 |
| Error(time)            | Sphericity Assumed | 11.292                  | 5978    | .002        |         |      |
|                        | Greenhouse-Geisser | 11.292                  | 159.262 | .071        |         |      |
|                        | Huynh-Feldt        | 11.292                  | 180.660 | .063        |         |      |
|                        | Lower-bound        | 11.292                  | 61.000  | .185        |         |      |

**Tests of Between-Subjects Effects**

| Source          | Type III Sum of Squares | df | Mean Square | F         | Sig. |
|-----------------|-------------------------|----|-------------|-----------|------|
| Intercept       | 4400.847                | 1  | 4400.847    | 21419.645 | .000 |
| Genotype        | 8.321                   | 1  | 8.321       | 40.501    | .000 |
| Drug            | 68.555                  | 2  | 34.278      | 166.835   | .000 |
| Genotype * Drug | 12.883                  | 2  | 6.441       | 31.351    | .000 |
| Error           | 12.533                  | 61 | .205        |           |      |

### Tukey Multiple Comparisons

| Drug | N  | Subset |       |       |
|------|----|--------|-------|-------|
|      | 1  | 2      | 3     | 1     |
| FSK  | 21 | .6946  |       |       |
| PDF  | 25 |        | .8258 |       |
| Veh  | 21 |        |       | .9556 |
| Sig. |    | 1.000  | 1.000 | 1.000 |

There is a strongly significant within-subjects effect of time ( $p < 0.001$ ). There is also a strongly significant ( $p < 0.001$ ) effect both main effects factors (Drug and Genotype) in addition to a significant interaction suggesting that the genotypes respond differently to the drug treatments. A Tukey post-hoc comparison reveals that there are no homogenous subsets of marginal means for the Drug treatment levels; each level produces its own distinct effect.

**Statistical analysis 8. On the effects of DH31 on the l-vLNs and s-vLNs in *w<sup>1118</sup>* and *han<sup>5304</sup>* flies (data from Figure 5).**

Data were analyzed using repeated measures two-way ANOVA with main effects factors genotype [*Han<sup>5304</sup>*, *w<sup>1118</sup>*] and cell-type [l-vLNs, s-vLNs].

**Tests of Within-Subjects Effects**

| Source                 |                    | Type III Sum of Squares | df      | Mean Square | F       | Sig. |
|------------------------|--------------------|-------------------------|---------|-------------|---------|------|
| time                   | Sphericity Assumed | 53.048                  | 98      | .541        | 124.398 | .000 |
|                        | Greenhouse-Geisser | 53.048                  | 3.014   | 17.600      | 124.398 | .000 |
|                        | Huynh-Feldt        | 53.048                  | 3.440   | 15.423      | 124.398 | .000 |
|                        | Lower-bound        | 53.048                  | 1.000   | 53.048      | 124.398 | .000 |
| time * Genotype        | Sphericity Assumed | 1.549                   | 98      | .016        | 3.632   | .000 |
|                        | Greenhouse-Geisser | 1.549                   | 3.014   | .514        | 3.632   | .014 |
|                        | Huynh-Feldt        | 1.549                   | 3.440   | .450        | 3.632   | .011 |
|                        | Lower-bound        | 1.549                   | 1.000   | 1.549       | 3.632   | .063 |
| time * Cell            | Sphericity Assumed | .605                    | 98      | .006        | 1.419   | .004 |
|                        | Greenhouse-Geisser | .605                    | 3.014   | .201        | 1.419   | .239 |
|                        | Huynh-Feldt        | .605                    | 3.440   | .176        | 1.419   | .235 |
|                        | Lower-bound        | .605                    | 1.000   | .605        | 1.419   | .239 |
| time * Genotype * Cell | Sphericity Assumed | 1.799                   | 98      | .018        | 4.218   | .000 |
|                        | Greenhouse-Geisser | 1.799                   | 3.014   | .597        | 4.218   | .007 |
|                        | Huynh-Feldt        | 1.799                   | 3.440   | .523        | 4.218   | .005 |
|                        | Lower-bound        | 1.799                   | 1.000   | 1.799       | 4.218   | .045 |
| Error(time)            | Sphericity Assumed | 20.469                  | 4704    | .004        |         |      |
|                        | Greenhouse-Geisser | 20.469                  | 144.679 | .141        |         |      |
|                        | Huynh-Feldt        | 20.469                  | 165.103 | .124        |         |      |
|                        | Lower-bound        | 20.469                  | 48.000  | .426        |         |      |

**Tests of Between-Subjects Effects**

| Source          | Type III Sum of Squares | df | Mean Square | F        | Sig. |
|-----------------|-------------------------|----|-------------|----------|------|
| Intercept       | 3623.110                | 1  | 3623.110    | 4790.274 | .000 |
| Genotype        | .246                    | 1  | .246        | .325     | .571 |
| Cell            | .021                    | 1  | .021        | .028     | .869 |
| Genotype * Cell | 2.890                   | 1  | 2.890       | 3.820    | .056 |
| Error           | 36.305                  | 48 | .756        |          |      |

There is a strongly significant within-subjects effect of time ( $p < 0.001$ ). There is no significant effect of either main effects factor (genotype or cell-type) but a marginally significant interaction between the two ( $p = 0.056$ ).

**Statistical analysis 9. On the effects of PDFr overexpression on the responses of l-vLNs and s-vLNs to 10<sup>-5</sup>M PDF (data from figure 6).**

Data were analyzed by two-way repeated measures ANOVA with fixed factors cell-type [l-vLNs, s-vLNs] and PDFr expression [control, over-expression].

**Tests of Within-Subjects Effects**

| Source             |                    | Type III Sum of Squares | df      | Mean Square | F       | Sig. |
|--------------------|--------------------|-------------------------|---------|-------------|---------|------|
| time               | Sphericity Assumed | 154.575                 | 98      | 1.577       | 237.744 | .000 |
|                    | Greenhouse-Geisser | 154.575                 | 2.562   | 60.342      | 237.744 | .000 |
|                    | Huynh-Feldt        | 154.575                 | 2.743   | 56.343      | 237.744 | .000 |
|                    | Lower-bound        | 154.575                 | 1.000   | 154.575     | 237.744 | .000 |
| time * Cell        | Sphericity Assumed | 2.245                   | 98      | .023        | 3.453   | .000 |
|                    | Greenhouse-Geisser | 2.245                   | 2.562   | .876        | 3.453   | .023 |
|                    | Huynh-Feldt        | 2.245                   | 2.743   | .818        | 3.453   | .020 |
|                    | Lower-bound        | 2.245                   | 1.000   | 2.245       | 3.453   | .067 |
| time * PDFr        | Sphericity Assumed | 15.379                  | 98      | .157        | 23.653  | .000 |
|                    | Greenhouse-Geisser | 15.379                  | 2.562   | 6.003       | 23.653  | .000 |
|                    | Huynh-Feldt        | 15.379                  | 2.743   | 5.606       | 23.653  | .000 |
|                    | Lower-bound        | 15.379                  | 1.000   | 15.379      | 23.653  | .000 |
| time * Cell * PDFr | Sphericity Assumed | 5.689                   | 98      | .058        | 8.750   | .000 |
|                    | Greenhouse-Geisser | 5.689                   | 2.562   | 2.221       | 8.750   | .000 |
|                    | Huynh-Feldt        | 5.689                   | 2.743   | 2.074       | 8.750   | .000 |
|                    | Lower-bound        | 5.689                   | 1.000   | 5.689       | 8.750   | .004 |
| Error(time)        | Sphericity Assumed | 54.615                  | 8232    | .007        |         |      |
|                    | Greenhouse-Geisser | 54.615                  | 215.177 | .254        |         |      |
|                    | Huynh-Feldt        | 54.615                  | 230.451 | .237        |         |      |
|                    | Lower-bound        | 54.615                  | 84.000  | .650        |         |      |

**Tests of Between-Subjects Effects**

| Source      | Type III Sum of Squares | df | Mean Square | F        | Sig. |
|-------------|-------------------------|----|-------------|----------|------|
| Intercept   | 4413.371                | 1  | 4413.371    | 8245.491 | .000 |
| Cell        | 8.589                   | 1  | 8.589       | 16.047   | .000 |
| PDFr        | 61.820                  | 1  | 61.820      | 115.497  | .000 |
| Cell * PDFr | 18.758                  | 1  | 18.758      | 35.045   | .000 |
| Error       | 44.961                  | 84 | .535        |          |      |

There is a strongly significant within-subjects effect of time ( $p < 0.001$ ). There is also a strongly significant ( $p < 0.001$ ) effect of both main effects factors (Peptide and PDFr over-expression state). Additionally, there was a significant interaction ( $p < 0.001$ ) indicating that the different cell types responded differently to the state of PDFr overexpression.

**Statistical analysis 10. On the effects of 10<sup>-6</sup>M PDF on various clock neuron classes (data from figure 7).**

Data were analyzed through two-way repeated measures ANOVA with the fixed factors peptide treatment [Vehicle, PDF] and Cell [5<sup>th</sup> s-vLN, dLN, DN1a, DN1p, DN2, DN3]. A Tukey post-hoc comparison of the cell types was then performed.

**Tests of Within-Subjects Effects**

| Source                |                    | Type III Sum of Squares | df      | Mean Square | F       | Sig. |
|-----------------------|--------------------|-------------------------|---------|-------------|---------|------|
| time                  | Sphericity Assumed | 70.453                  | 98      | .719        | 244.829 | .000 |
|                       | Greenhouse-Geisser | 70.453                  | 3.442   | 20.471      | 244.829 | .000 |
|                       | Huynh-Feldt        | 70.453                  | 3.766   | 18.706      | 244.829 | .000 |
|                       | Lower-bound        | 70.453                  | 1.000   | 70.453      | 244.829 | .000 |
| time * Cell           | Sphericity Assumed | 5.350                   | 490     | .011        | 3.718   | .000 |
|                       | Greenhouse-Geisser | 5.350                   | 17.208  | .311        | 3.718   | .000 |
|                       | Huynh-Feldt        | 5.350                   | 18.831  | .284        | 3.718   | .000 |
|                       | Lower-bound        | 5.350                   | 5.000   | 1.070       | 3.718   | .003 |
| time * Peptide        | Sphericity Assumed | 17.175                  | 98      | .175        | 59.685  | .000 |
|                       | Greenhouse-Geisser | 17.175                  | 3.442   | 4.990       | 59.685  | .000 |
|                       | Huynh-Feldt        | 17.175                  | 3.766   | 4.560       | 59.685  | .000 |
|                       | Lower-bound        | 17.175                  | 1.000   | 17.175      | 59.685  | .000 |
| time * Cell * Peptide | Sphericity Assumed | 2.352                   | 490     | .005        | 1.635   | .000 |
|                       | Greenhouse-Geisser | 2.352                   | 17.208  | .137        | 1.635   | .051 |
|                       | Huynh-Feldt        | 2.352                   | 18.831  | .125        | 1.635   | .044 |
|                       | Lower-bound        | 2.352                   | 5.000   | .470        | 1.635   | .154 |
| Error(time)           | Sphericity Assumed | 46.330                  | 15778   | .003        |         |      |
|                       | Greenhouse-Geisser | 46.330                  | 554.108 | .084        |         |      |
|                       | Huynh-Feldt        | 46.330                  | 606.370 | .076        |         |      |
|                       | Lower-bound        | 46.330                  | 161.000 | .288        |         |      |

**Tests of Between-Subjects Effects**

| Source         | Type III Sum of Squares | df  | Mean Square | F         | Sig. |
|----------------|-------------------------|-----|-------------|-----------|------|
| Intercept      | 9908.492                | 1   | 9908.492    | 17172.368 | .000 |
| Cell           | 12.740                  | 5   | 2.548       | 4.416     | .001 |
| Peptide        | 81.426                  | 1   | 81.426      | 141.118   | .000 |
| Cell * Peptide | 7.291                   | 5   | 1.458       | 2.527     | .031 |
| Error          | 92.897                  | 161 | .577        |           |      |



**Tukey Post-Hoc Comparison**

| Cell     | N  | Subset |        |        |
|----------|----|--------|--------|--------|
|          |    | 1      | 2      | 3      |
| DN2      | 16 | .23321 |        |        |
| DN1a     | 22 | .27193 | .27193 |        |
| LNd      | 52 | .28577 | .28577 |        |
| DN3      | 22 | .30234 | .30234 | .30234 |
| DN1p     | 45 |        | .32148 | .32148 |
| 5thSmall | 16 |        |        | .36234 |
| Sig.     |    | .054   | .321   | .137   |

There is a strongly significant within-subjects effect of time ( $p < 0.001$ ). There is also a strongly significant ( $p < 0.001$ ) effect of both main effects factors (peptide treatment and cell-type). Additionally, there was a significant interaction ( $p = 0.031$ ) indicating that the different cell types responded differently to the peptide treatments. Finally, a Tukey post-hoc comparison revealed that there were homogenous subsets of cell types relating to their degree of responsiveness to PDF.

**Statistical analysis 11. On the effects of 10<sup>-6</sup>M PDF on the dorsal projections of s-vLNs (data from figure S3).**

Data were analyzed using repeated measures single-factor ANOVA with main effects factor Peptide treatment [Vehicle, PDF].

**Tests of Within-Subjects Effects**

| Source      |                    | Type III Sum of Squares | df     | Mean Square | F      | Sig. |
|-------------|--------------------|-------------------------|--------|-------------|--------|------|
| time        | Sphericity Assumed | 7.292                   | 98     | .074        | 19.702 | .000 |
|             | Greenhouse-Geisser | 7.292                   | 2.448  | 2.979       | 19.702 | .000 |
|             | Huynh-Feldt        | 7.292                   | 4.049  | 1.801       | 19.702 | .000 |
|             | Lower-bound        | 7.292                   | 1.000  | 7.292       | 19.702 | .002 |
| time *      | Sphericity Assumed | 4.436                   | 98     | .045        | 11.985 | .000 |
|             | Greenhouse-Geisser | 4.436                   | 2.448  | 1.812       | 11.985 | .000 |
|             | Huynh-Feldt        | 4.436                   | 4.049  | 1.095       | 11.985 | .000 |
|             | Lower-bound        | 4.436                   | 1.000  | 4.436       | 11.985 | .009 |
| Peptide     | Sphericity Assumed | 2.961                   | 784    | .004        |        |      |
|             | Greenhouse-Geisser | 2.961                   | 19.585 | .151        |        |      |
|             | Huynh-Feldt        | 2.961                   | 32.396 | .091        |        |      |
|             | Lower-bound        | 2.961                   | 8.000  | .370        |        |      |
| Error(time) | Sphericity Assumed | 2.961                   | 784    | .004        |        |      |
|             | Greenhouse-Geisser | 2.961                   | 19.585 | .151        |        |      |
|             | Huynh-Feldt        | 2.961                   | 32.396 | .091        |        |      |
|             | Lower-bound        | 2.961                   | 8.000  | .370        |        |      |

**Tests of Between-Subjects Effects**

| Source    | Type III Sum of Squares | df | Mean Square | F        | Sig. |
|-----------|-------------------------|----|-------------|----------|------|
| Intercept | 667.399                 | 1  | 667.399     | 1793.904 | .000 |
| Peptide   | 10.603                  | 1  | 10.603      | 28.501   | .001 |
| Error     | 2.976                   | 8  | .372        |          |      |

There is a strongly significant within-subjects effect of time ( $p < 0.001$ ). There is also a strongly significant ( $p = 0.001$ ) effect of the peptide treatment with mean FRET loss values of the PDF treatment higher than those of vehicle.

**Statistical analysis 12. On the effects of 10<sup>-5</sup>M PDF on the l-vLNs and s-vLNs observed with confocal imaging (data from figure 8).**

Data were analyzed through two-way repeated measures ANOVA with the fixed factors Peptide [Vehicle, PDF] and cell-type [l-vLNs, s-vLNs].

**Tests of Within-Subjects Effects**

| Source                |                    | Type III Sum of Squares | df      | Mean Square | F       | Sig. |
|-----------------------|--------------------|-------------------------|---------|-------------|---------|------|
| time                  | Sphericity Assumed | 13.036                  | 98      | .133        | 128.112 | .000 |
|                       | Greenhouse-Geisser | 13.036                  | 2.120   | 6.150       | 128.112 | .000 |
|                       | Huynh-Feldt        | 13.036                  | 2.336   | 5.582       | 128.112 | .000 |
|                       | Lower-bound        | 13.036                  | 1.000   | 13.036      | 128.112 | .000 |
| time * Cell           | Sphericity Assumed | 3.923                   | 98      | .040        | 38.552  | .000 |
|                       | Greenhouse-Geisser | 3.923                   | 2.120   | 1.851       | 38.552  | .000 |
|                       | Huynh-Feldt        | 3.923                   | 2.336   | 1.680       | 38.552  | .000 |
|                       | Lower-bound        | 3.923                   | 1.000   | 3.923       | 38.552  | .000 |
| time * Peptide        | Sphericity Assumed | 4.049                   | 98      | .041        | 39.789  | .000 |
|                       | Greenhouse-Geisser | 4.049                   | 2.120   | 1.910       | 39.789  | .000 |
|                       | Huynh-Feldt        | 4.049                   | 2.336   | 1.734       | 39.789  | .000 |
|                       | Lower-bound        | 4.049                   | 1.000   | 4.049       | 39.789  | .000 |
| time * Cell * Peptide | Sphericity Assumed | 3.606                   | 98      | .037        | 35.433  | .000 |
|                       | Greenhouse-Geisser | 3.606                   | 2.120   | 1.701       | 35.433  | .000 |
|                       | Huynh-Feldt        | 3.606                   | 2.336   | 1.544       | 35.433  | .000 |
|                       | Lower-bound        | 3.606                   | 1.000   | 3.606       | 35.433  | .000 |
| Error(time)           | Sphericity Assumed | 5.393                   | 5194    | .001        |         |      |
|                       | Greenhouse-Geisser | 5.393                   | 112.352 | .048        |         |      |
|                       | Huynh-Feldt        | 5.393                   | 123.782 | .044        |         |      |
|                       | Lower-bound        | 5.393                   | 53.000  | .102        |         |      |

**Tests of Between-Subjects Effects**

| Source         | Type III Sum of Squares | df | Mean Square | F         | Sig. |
|----------------|-------------------------|----|-------------|-----------|------|
| Intercept      | 4532.719                | 1  | 4532.719    | 45666.595 | .000 |
| Cell           | 10.831                  | 1  | 10.831      | 109.119   | .000 |
| Peptide        | 11.375                  | 1  | 11.375      | 114.606   | .000 |
| Cell * Peptide | 11.135                  | 1  | 11.135      | 112.187   | .000 |
| Error          | 5.261                   | 53 | .099        |           |      |

There is a strongly significant within-subjects effect of time ( $p < 0.001$ ). There is also a strongly significant ( $p < 0.001$ ) effect of both main effects factors (peptide and cell-type). Additionally, there was a highly significant interaction ( $p < 0.001$ ) indicating that the different cell-types responded differently to the drug treatments.

**Statistical analysis 13. On the effects of 10<sup>-5</sup>M PDF on DN2s using confocal imaging (data from figure 8).**

Data were analyzed through one-way repeated measures ANOVA with the fixed factor Peptide [Vehicle, PDF].

**Tests of Within-Subjects Effects**

| Source      |                    | Type III Sum of Squares | df     | Mean Square | F      | Sig. |
|-------------|--------------------|-------------------------|--------|-------------|--------|------|
| time        | Sphericity Assumed | 5.172                   | 98     | .053        | 30.607 | .000 |
|             | Greenhouse-Geisser | 5.172                   | 2.897  | 1.786       | 30.607 | .000 |
|             | Huynh-Feldt        | 5.172                   | 3.761  | 1.375       | 30.607 | .000 |
|             | Lower-bound        | 5.172                   | 1.000  | 5.172       | 30.607 | .000 |
| time *      | Sphericity Assumed | 1.195                   | 98     | .012        | 7.069  | .000 |
|             | Greenhouse-Geisser | 1.195                   | 2.897  | .412        | 7.069  | .001 |
|             | Huynh-Feldt        | 1.195                   | 3.761  | .318        | 7.069  | .000 |
|             | Lower-bound        | 1.195                   | 1.000  | 1.195       | 7.069  | .017 |
| peptide     | Sphericity Assumed | 2.873                   | 1666   | .002        |        |      |
|             | Greenhouse-Geisser | 2.873                   | 49.243 | .058        |        |      |
|             | Huynh-Feldt        | 2.873                   | 63.929 | .045        |        |      |
|             | Lower-bound        | 2.873                   | 17.000 | .169        |        |      |
| Error(time) | Sphericity Assumed | 2.873                   | 1666   | .002        |        |      |
|             | Greenhouse-Geisser | 2.873                   | 49.243 | .058        |        |      |
|             | Huynh-Feldt        | 2.873                   | 63.929 | .045        |        |      |
|             | Lower-bound        | 2.873                   | 17.000 | .169        |        |      |

**Tests of Between-Subjects Effects**

| Source    | Type III Sum of Squares | df | Mean Square | F        | Sig. |
|-----------|-------------------------|----|-------------|----------|------|
| Intercept | 1469.297                | 1  | 1469.297    | 4278.251 | .000 |
| peptide   | 5.227                   | 1  | 5.227       | 15.219   | .001 |
| Error     | 5.838                   | 17 | .343        |          |      |

There is a strongly significant within-subjects effect of time ( $p < 0.001$ ). There is also a strongly significant ( $p = 0.001$ ) effect the peptide indicating that PDF treatments had statistically higher levels of FRET loss than vehicle treatments.

## Supplemental Figures

### Supplemental Figure S1

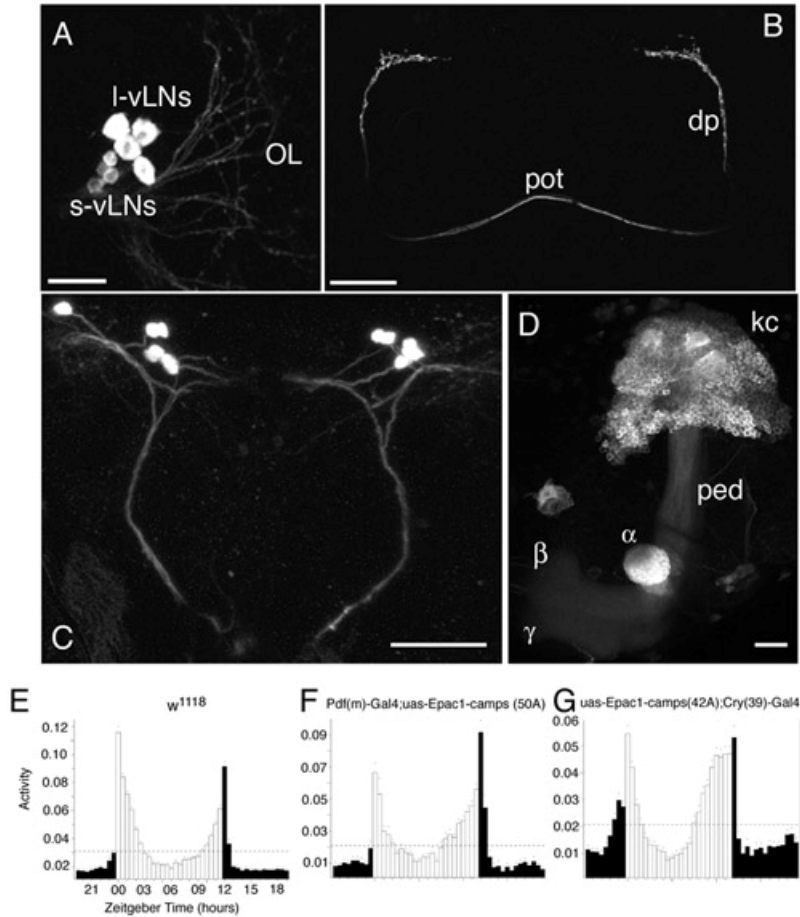

**Figure S1.** *Drosophila* neurons are not affected morphologically by Gal4/uas-driven *Epac1-camps* expression. A. Confocal z-series reconstruction of vLNs in a living *uasEpac1-camps(42A)/y;BMRJ-Gal4/+* fly. The number and morphology of the l-vLNs and s-vLNs are normal, as are the l-vLN projections over the optic lobe (OL). Scale bar = 25uM. B. Confocal z-series reconstruction of the posterior brain of the same genotype reveals normal dorsal projections (dp) and posterior optic tract (pot). Scale Bar = 50uM. C. Confocal z-series reconstruction of the corazonin neurons in a living *uas-Epac1-camps50A/+;Crz-Gal4/+* brain. The number and morphology of *Epac1-camps*-expressing neurons are normal. D. The morphology of the mushroom bodies is normal in living *uas-Epac1-camps(50A)/+;30Y-Gal4/+* brains. The Kenyon cells (kc) pedunculus (ped)  $\alpha$ -,  $\beta$ -, and  $\gamma$ -lobes are labeled. E. Average daily activity of 32 *w<sup>1118</sup>* (wild-type) male flies during one week under a 12:12 LD cycle. F. Average daily activity of 32 *Pdf(m)-Gal4;uas-Epac1-camps(50A)* male flies during one week under a 12:12 LD cycle. G. Average daily activity of 32 *uas-Epac1-camps(42A);Cry(39)-Gal4* male flies during one week of a 12:12 LD cycle.

## Supplemental Figure S2

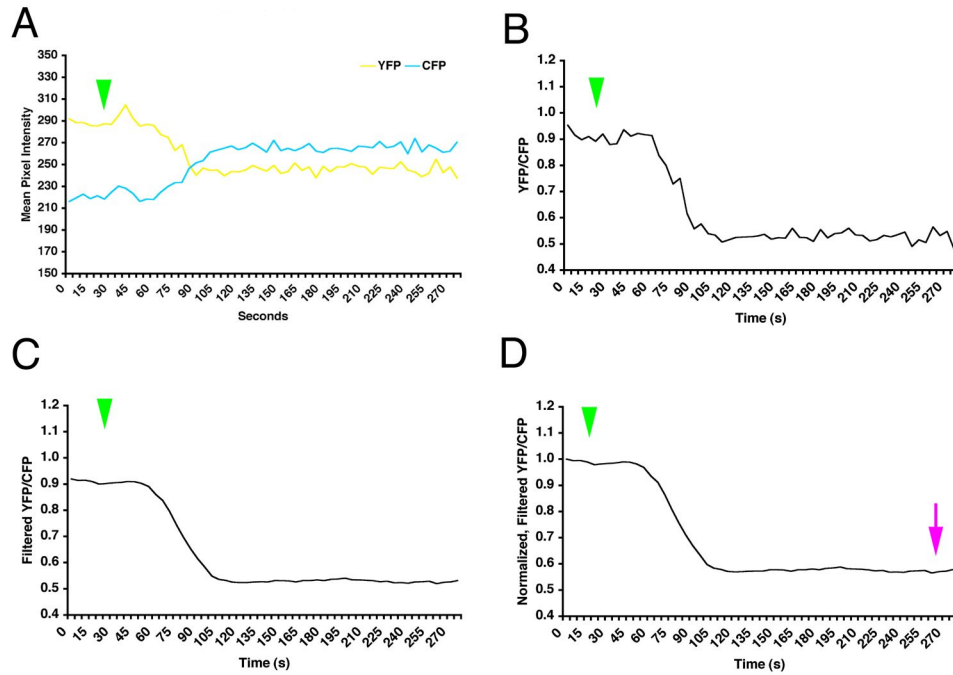

**Figure S2.** Quantification, filtering, and normalization of Epac1-camps FRET in a single 10µM forskolin-treated l-vLN. A. Time-course of CFP Donor and YFP FRET emission intensity values for the l-LNV shown in figure 1C. Green triangles represent the start of the drop-wise addition of 10µM forskolin in all graphs. B. Time-course of YFP/CFP ratio from A. C. The data from B after application of a 7-point moving average filter. D. The data from C after normalization to the first time-point. Averages of population responses were obtained from the filtered and normalized data. The magenta arrow indicates the lowest YFP/CFP value used to determine the maximum FRET loss (see Figure 3B).

Supplemental Figure S3

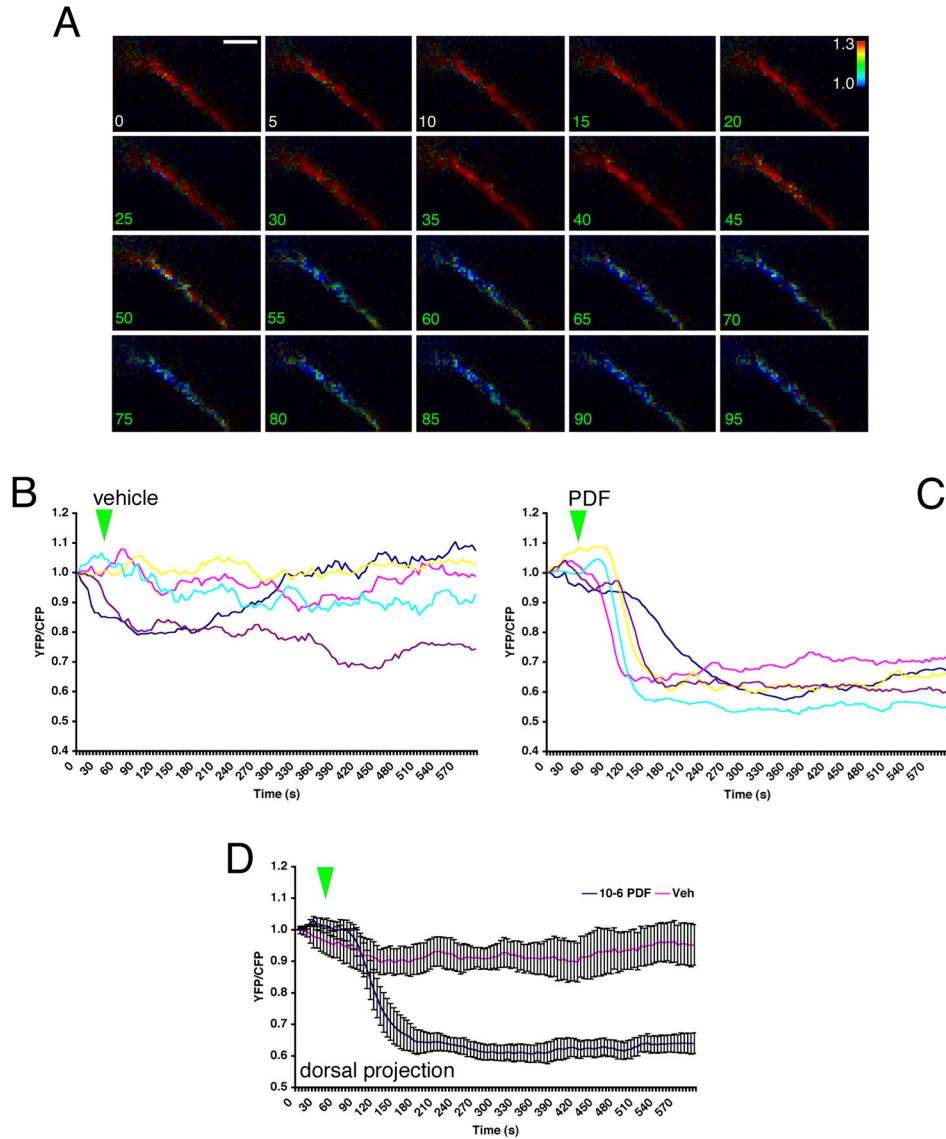

**Figure S3.** A. Pseudo-colored time-course of Epac1-camps FRET in the dorsal projections of the s-vLNs in a *Pdf(m)-Gal4;uas-Epac1-camps(50A)* brain treated with  $10^{-6}$ M PDF. The time-point of each image is indicated on each frame in seconds and green times indicated the presence of PDF. The look-up table values un-normalized YFP/CFP values. Scale bar =  $10\mu\text{m}$ . B. Epac1-camps FRET plots for 5 s-vLN dorsal projections from 5 vehicle treated *Pdf(m)-Gal4;uas-Epac1-camps(50A)* brains. The green triangle indicates the start of bath-application. C. Epac1-camps FRET plots for 5 s-vLN dorsal projections from 5 *Pdf(m)-Gal4;uas-Epac1-camps(50A)* brains treated with  $10^{-6}$ M PDF. D. Average Epac1-camps FRET plots response of the s-vLN dorsal projections of PDF (blue) and vehicle (magenta) treated *Pdf(m)-*



*Gal4;uas-Epac1-camps(50A)* brains. A single-factor repeated measures ANOVA revealed that the effect of PDF on the dorsal projections was highly significant ( $p=0.01$ ).

### Supplemental Figure S4

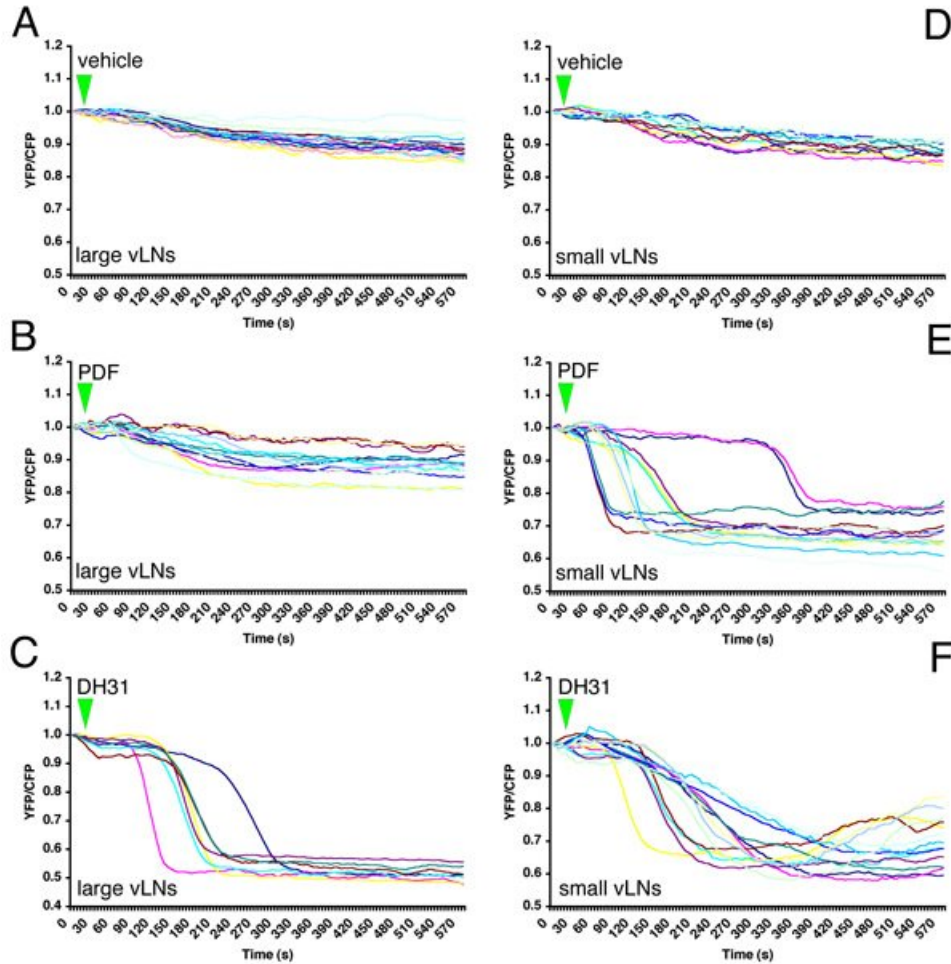

**Figure S4.** Both the l-vLNs and s-vLNs respond to bath-applied  $10^{-6}$ M DH31, but only the s-vLNs respond to  $10^{-6}$ M PDF. A-F. Individual cell plots from vehicle, DH31, and PDF treated l-vLNs and s-vLNs from figures 3E and F. A. Epac1-camps FRET time-courses for 14 l-vLNs from five brains treated with vehicle (0.1% DMSO in HL3 Saline). Green triangles indicate the start of bath-application. B. Epac1-camps FRET time-courses for 13 l-vLNs from six brains treated with  $10^{-6}$ M PDF. C. Epac1-camps FRET time-courses for 7 l-vLNs from four brains treated with  $10^{-6}$ M DH31. D. Epac1-camps FRET time-courses for 11 s-vLNs from five brains treated with vehicle. E. Epac1-camps FRET time-courses for 13 s-vLNs from five brains treated with  $10^{-6}$ M PDF. F. Epac1-camps FRET time-courses for 13 s-vLNs from five brains treated with  $10^{-6}$ M DH31.

Supplemental Figure S5

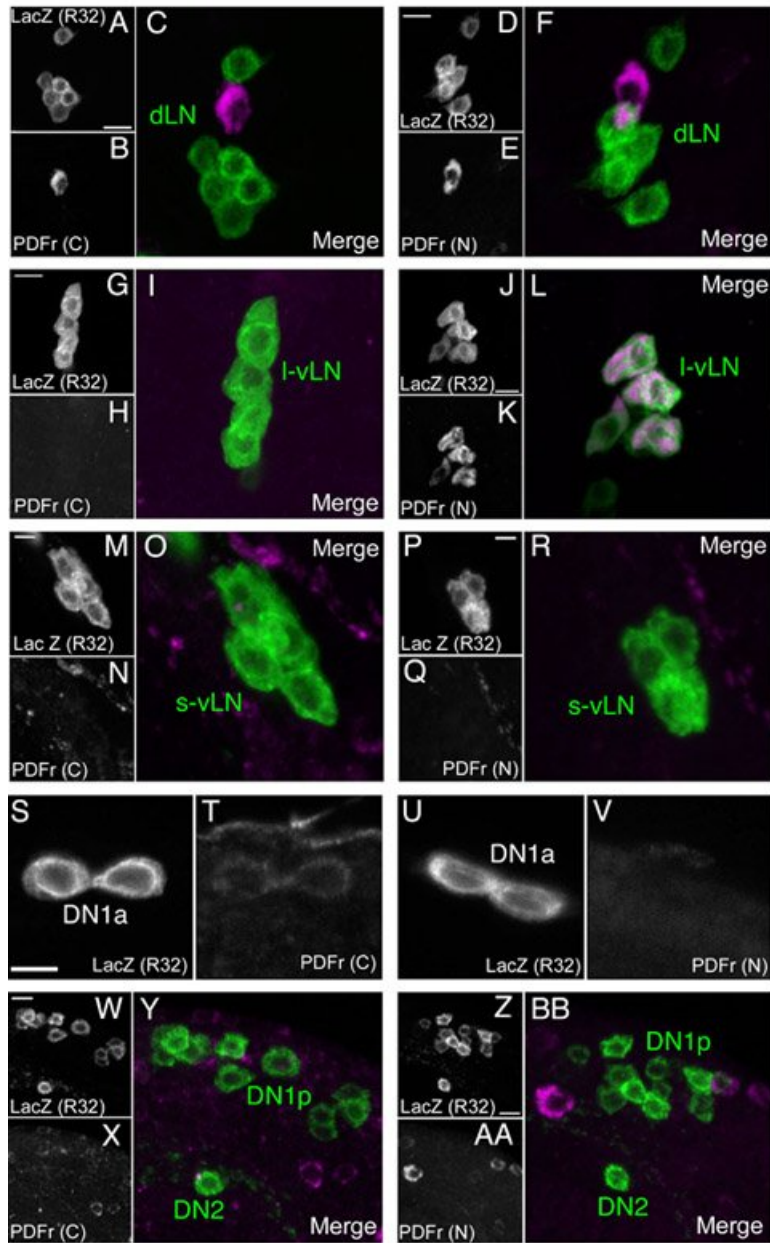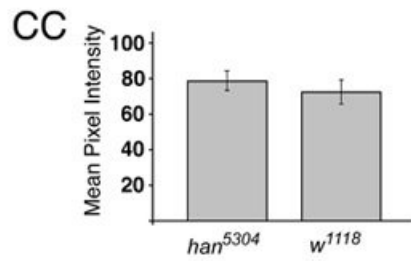

**Figure S5.** A comparison of anti-PDFr immunosignals in the clock neurons of P{R32-lacZ} flies. A-C. Anti-PDFr(C) immunostaining in the dLNs. A. A z-series of anti- $\beta$ -gal staining in the region containing the dLNs (scale bar = 10 $\mu$ M). B. Anti-PDFr(C) signals in the same z-series. C. Merged image of (A) and (B) with  $\beta$ -gal in green and anti-PDFr(C) in magenta. There is no clear overlap of anti-PDFr and anti- $\beta$ -gal immunosignals. D-E. Anti PDFr(N) immunostaining in the dLNs. D. A z-series of anti- $\beta$ -gal staining containing the dLNs (scale bar = 10 $\mu$ M). E. Anti-PDFr(N) in the same series. C. Merged image (D) and (E) with  $\beta$ -gal in green and anti-PDFr(N) in magenta. There is no clear overlap of anti-PDFr and anti- $\beta$ -gal immunosignals. Note the similarities in size and location of the PDFr-positive cells in (C) and (F). G-I. Anti-PDFr(C) immunostaining in the l-vLNs. G. A z-series of anti- $\beta$ -gal staining containing the l-vLNs (scale bar = 10 $\mu$ M). H. Anti-PDFr(C) in the same z-series. D. Merged image of G and H with  $\beta$ -gal in green and anti-PDFr(C) in magenta. There are no cell bodies immunoreactive to anti-PDFr(C) in this z-series. J-L. Anti-PDFr(N) immunostaining in the l-vLNs. J. A z-series of anti-LacZ staining containing the l-vLNs (scale bar = 10 $\mu$ M). K. Anti-PDFr(N) in the same z-series. L. Merged images of (J) and (K) reveal clear co-localization of PDFr immunosignals and R32- $\beta$ -gal (c.f. Hyun *et al.* 2005). M-O. Anti-PDFr(C) immunostaining in the s-vLNs. M. A z-series of anti- $\beta$ -gal staining containing the s-vLNs (scale bar = 5 $\mu$ M). N. Anti-PDFr(C) signals in the same z-series. O. Merged image of (M) and (N) with  $\beta$ -gal in green and anti-PDFr(C) in magenta. PDFr(C)-positive puncta a visible near the s-vLN cell bodies, but there is no co-localization. P-R. Anti-PDFr(N) immunostaining in the s-vLNs. P. A z-series of anti- $\beta$ -gal staining containing the s-vLNs (scale bar = 5 $\mu$ M). Q. Anti-PDFr(N) signals in the same z-series. R. Merged image of (P) and (Q) with  $\beta$ -gal in green and anti-PDFr(N) in magenta. PDFr(N)-positive puncta a visible near the s-vLN cell bodies, but there is no co-localization. S-T. Anti-PDFr(C) immunostaining in DN1<sub>a</sub>s. S. A single optical section of  $\beta$ -gal-labeled DN1<sub>a</sub>s. T. The same optical section scanned for PDFr(C) immunoreactivity reveals weak PDFr(C) immunosignals (Mertens *et al.* 2005; scale bar = 5 $\mu$ M). U-V. Anti PDFr(N) immunostaining in DN1<sub>a</sub>s. U. A single optical section of  $\beta$ -gal-labeled DN1<sub>a</sub>s. V. The same optical section scanned for PDFr(N) immunoreactivity reveals no PDFr(N) immunosignals. W-Y. Anti-PDFr(C) immunostaining in DN1<sub>p</sub>s and the DN2s. W. A z-series containing  $\beta$ -gal-labeled DN1<sub>p</sub>s and a DN2. X. The same z-series scanned for anti-PDFr(c). Y. A merged image of E and F reveals PDFr(C)-positive soma and puncta with no clear overlap in immunosignals (Mertens *et al.* 2005). Z-BB. Anti-PDFr(N) immunostaining in DN1<sub>p</sub>s and the DN2s. Z. A z-series containing  $\beta$ -gal-labeled DN1<sub>p</sub>s and a DN2. AA. The same z-series scanned for anti-PDFr(N). BB. A merged image of (H) and (I) reveals PDFr(N)-positive soma and puncta with no clear overlap in immunosignals. CC. A quantification of anti-PDFr(N) immunosignals in the l-vLNs of *han*<sup>5304</sup> and *w*<sup>1118</sup> flies reveals no significant difference in staining intensity.

## Supplemental Figure S6

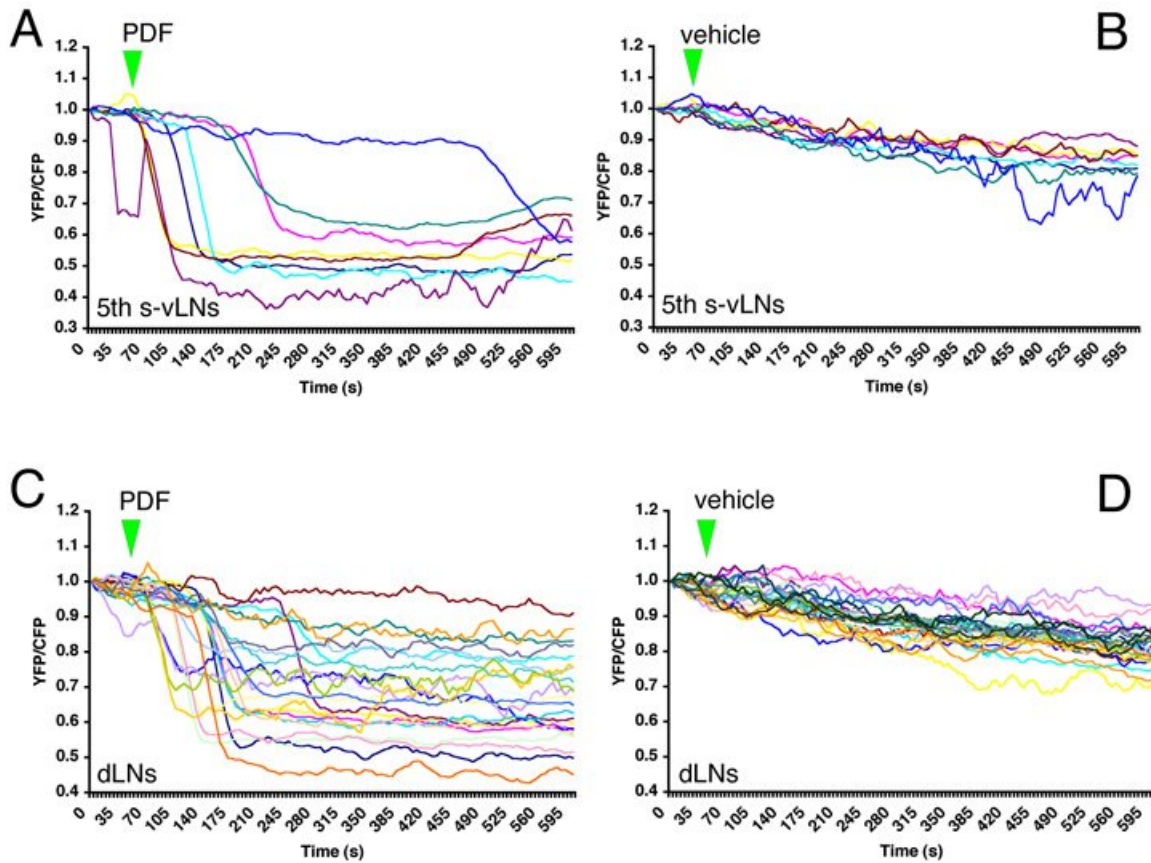

**Figure S6.** The 5<sup>th</sup> s-vLN and the dLNs respond to bath-applied PDF with cAMP increases. A. Epac1-camps FRET time-courses for eight 5<sup>th</sup> s-vLNs from eight *uas-Epac1-camps(42A)/y;Cry(39)-Gal4/Pdf-Gal80* brains treated with 10<sup>-5</sup>M PDF. Green triangles indicate the time of bath application. B. Epac1-camps FRET time-courses for eight 5<sup>th</sup> s-vLNs from eight *uas-Epac1-camps(42A)/y;Cry(39)-Gal4/Pdf-Gal80* brains treated with vehicle (0.1% DMSO in HL3 saline). C. Epac1-camps FRET time-courses for 24 dLNs from eight *uas-Epac1-camps(42A)/y;Cry(39)-Gal4* brains treated with 10<sup>-5</sup>M PDF. Note the presence of neurons that did not respond to PDF. Green triangles indicate the time of bath application. D. Epac1-camps FRET time-courses for 28 dLNs from eight *uas-Epac1-camps(42A)/y;Cry(39)-Gal4* brains treated with vehicle (0.1% DMSO in HL3 saline).



Supplemental Figure S7

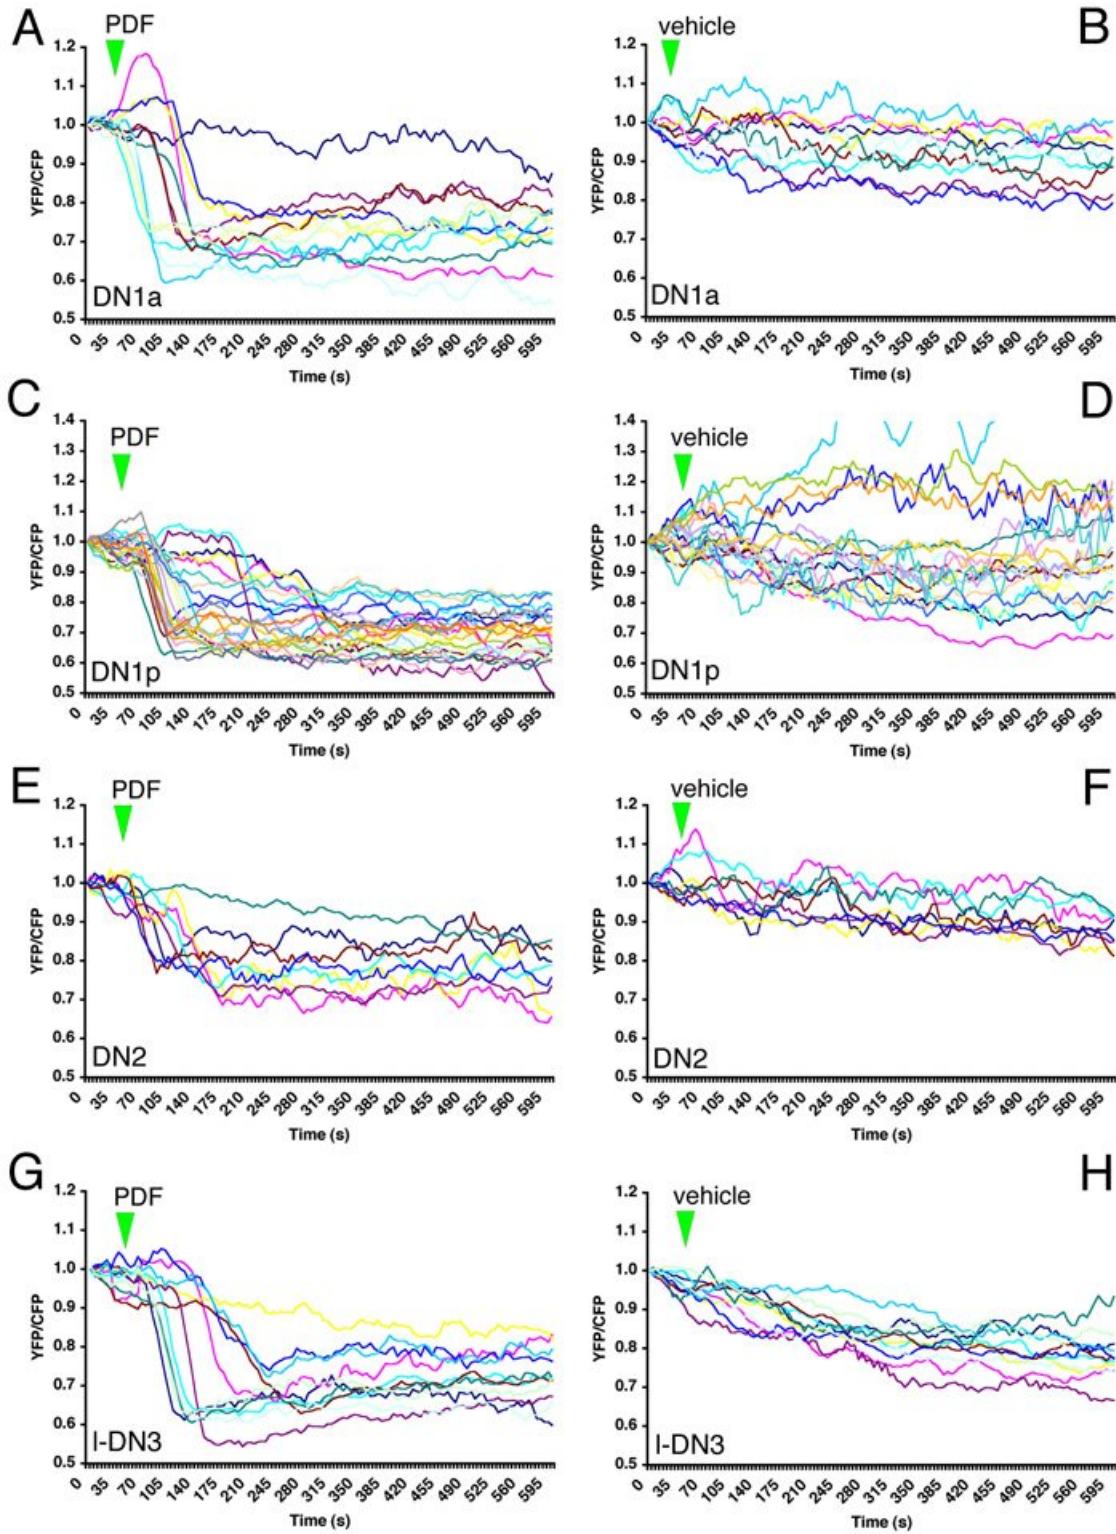

**Figure S7.** All classes of DN respond to bath-applied  $10^{-5}$ M PDF with increases in cAMP. A. Epac1-camps FRET time-courses for 12 DN1<sub>a</sub>s from seven *uas-Epac1-camps(42A)/y;Cry(39)-Gal4* brains treated with  $10^{-5}$ M PDF. Only one neuron failed to respond to PDF. Green triangles indicate the time of bath application. B. Epac1-camps FRET time-courses for ten DN1<sub>a</sub>s from 5 *uas-Epac1-camps(42A)/y;Cry(39)-Gal4* brains treated with vehicle (0.1% DMSO in HL3 saline). C. A. Epac1-camps FRET time-courses for 24 DN1<sub>p</sub>s from seven *uas-Epac1-camps(42A)/y;Cry(39)-Gal4* brains treated with  $10^{-5}$ M PDF. D. Epac1-camps FRET time-courses for 21 DN1<sub>p</sub>s from 7 *uas-Epac1-camps(42A)/y;Cry(39)-Gal4* brains treated with vehicle (0.1% DMSO in HL3 saline). Note the large fluctuations and variance in cAMP dynamics. E. Epac1-camps FRET time-courses for eight DN2s from 6 *uas-Epac1-camps(42A)/y;Cry(39)-Gal4* brains treated with  $10^{-5}$ M PDF. F. Epac1-camps FRET time-courses for eight DN2s from six *uas-Epac1-camps(42A)/y;Cry(39)-Gal4* brains treated with vehicle (0.1% DMSO in HL3 saline). G. Epac1-camps FRET time-courses for eleven l-DN3s from nine *uas-Epac1-camps(42A)/y;Cry(39)-Gal4* brains treated with  $10^{-5}$ M PDF. Only one l-DN3 failed to respond to PDF. H. Epac1-camps FRET time-courses for eleven l-DN3s from seven *uas-Epac1-camps(42A)/y;Cry(39)-Gal4* brains treated with vehicle (0.1% DMSO in HL3 saline).
